# Supplementary material
Source: PubMed Central journal article supplement (PMC4338527)
Supplement: NIHMS60809-supplement-1.pdf [file NIHMS60809-supplement-1.pdf]

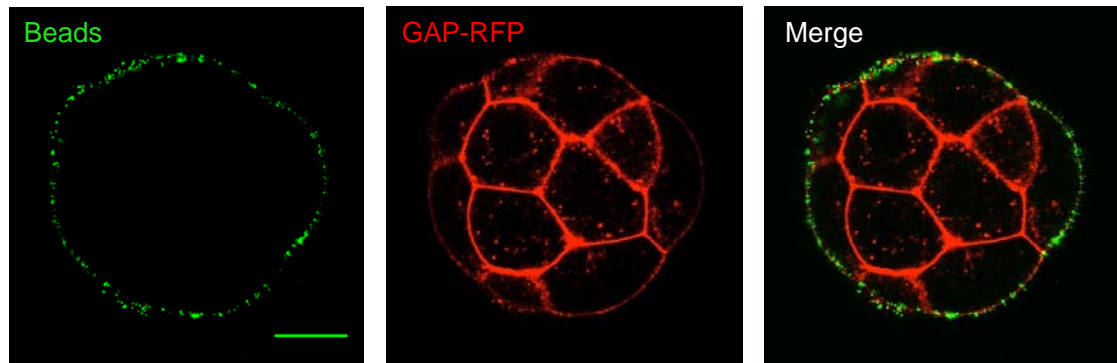

**Supplementary Figure 1. Labelling of outside cells at the 16-cell stage.** Example of 16-cell embryo that has been incubated in a suspension of 0.2  $\mu\text{m}$  fluorescent beads. Scale bar = 20  $\mu\text{m}$ . The embryo has been injected with *Gap43-RFP* mRNA so that cell boundaries can be clearly seen. The beads are only bound to outside cells that have an exposed surface.

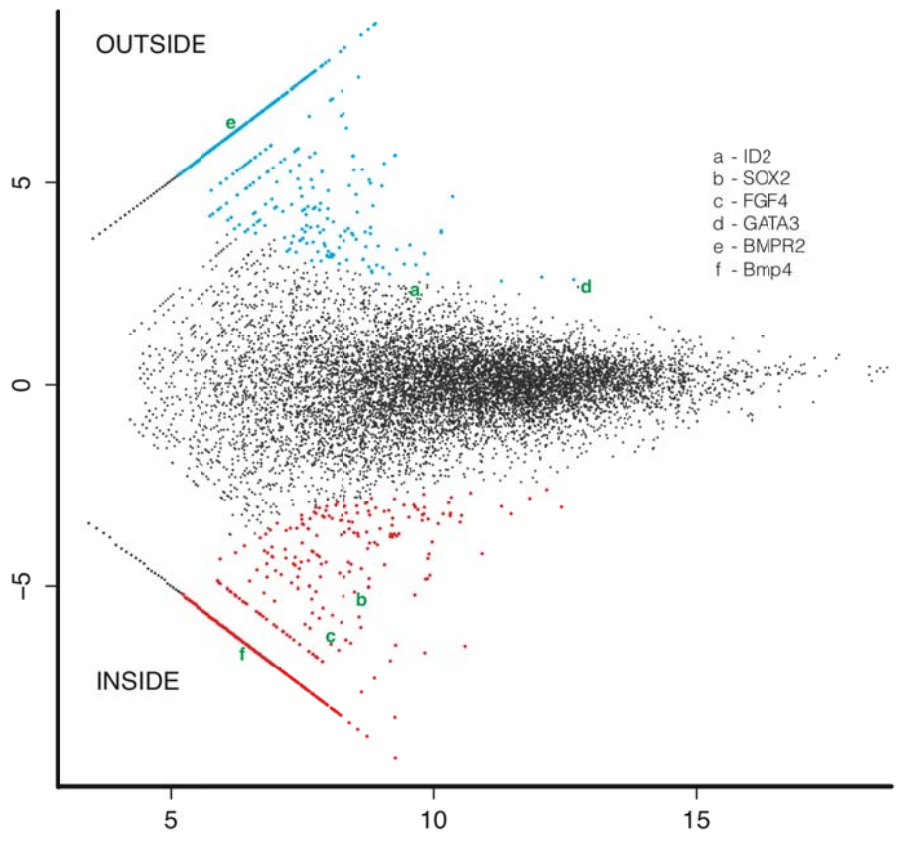

**Supplementary Figure 2. Differential gene expression in inside and outside cells.** MA plot for hits of all identified genes in either of the cell types. Genes that had less than 5-fold differential expression between inside and outside cells are in black. Genes enriched by more than 5-fold in inside or outside cells are in red and blue, respectively.

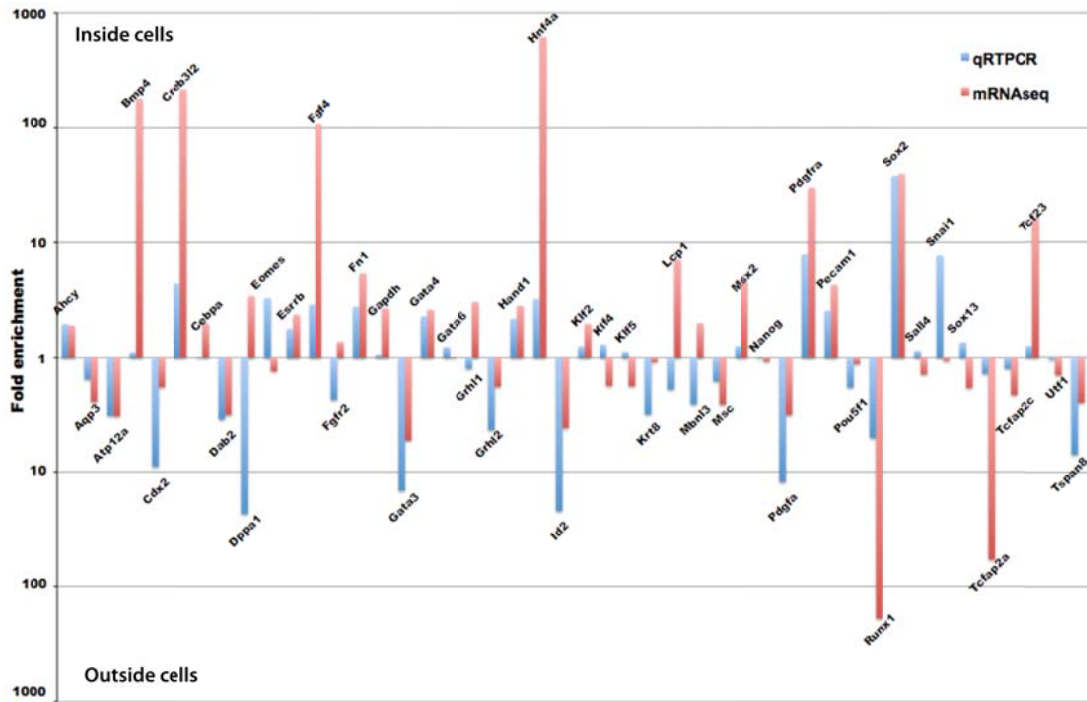

**Supplementary Figure 3. Confirmation of differential gene expression by qRT-PCR.**

qRT-PCR (blue bars) validation of the results obtained from mRNA-seq (red bars).

Expression values given as the relative fold enrichment in cell type with higher levels over the level in other cell type. 74% of genes (34/46) show enrichment in the same cell type using both methods.

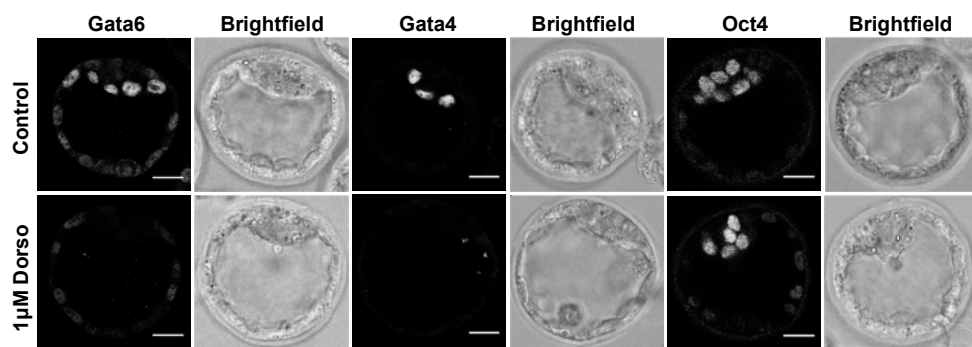

**Supplementary Figure 4. Effect of Dorsomorphin treatment on expression of PE and ICM markers.** Examples of expression of markers of the PE (Gata6 and Gata4) and ICM (Oct4) in embryos treated with 1.0  $\mu$ M Dorsomorphin from E2.5 to E4.5. Scale bars = 20  $\mu$ m.

**Supplementary Table 1. Differential gene expression at the 16-cell stage.** Numbers of genes with statistically significant (GFOLD p-value  $\leq 0.01$ ) value of particular fold enrichment in inside or outside cells. \* For genes with hit count of 0, a value of 0.5 was used in the calculation.

| <b>Fold enrichment threshold*</b> | <b>Genes in inside cells</b> | <b>Genes in outside cells</b> | <b>Remaining genes</b> |
|-----------------------------------|------------------------------|-------------------------------|------------------------|
| 2                                 | 1,574                        | 1,251                         | 8,334                  |
| 5                                 | 632                          | 473                           | 10,054                 |
| 10                                | 309                          | 239                           | 10,611                 |
| 25                                | 71                           | 37                            | 11,051                 |
| 50                                | 8                            | 5                             | 11,146                 |
